# Supplementary material
Source: Elsevier journal article supplement (https://www.sciencedirect.com/science/article/pii/S1575181318303383)
Supplement: mmc1 [file S1575181318303383:mmc1.pdf]

**MATERIAL SUPLEMENTARIO**

| Anexo 1. Valoración de relevancia de los ítems del cuestionario por cuatro grupos de interés |                                                                                                                                                                                                               |                   |      |                  |      |                   |      |                 |      |                    |      |                         |   |                            |  |
|----------------------------------------------------------------------------------------------|---------------------------------------------------------------------------------------------------------------------------------------------------------------------------------------------------------------|-------------------|------|------------------|------|-------------------|------|-----------------|------|--------------------|------|-------------------------|---|----------------------------|--|
| ítem                                                                                         | Estructura del ítem                                                                                                                                                                                           | Grupos de interés |      |                  |      |                   |      |                 |      |                    |      | Diferencias inter-grupo |   | Resultado de la evaluación |  |
|                                                                                              |                                                                                                                                                                                                               | Global (n=103)    |      | Cirujanos (n=25) |      | Residentes (n=22) |      | Internos (n=20) |      | Estudiantes (n=36) |      | Kruskal-Wallis          |   |                            |  |
|                                                                                              |                                                                                                                                                                                                               | M                 | DE   | M                | DE   | M                 | DE   | M               | DE   | M                  | DE   | χ²                      | p |                            |  |
| 1                                                                                            | Existe un ambiente seguro para expresar mis opiniones respecto al cuidado del paciente y desempeño del equipo de trabajo.                                                                                     | 4.06              | 1.01 | 4.36             | 0.95 | 4.41              | 0.73 | 3.60            | 1.14 | 3.89               | 1.01 | 9.27                    | * | Incluido                   |  |
| 2                                                                                            | Existe favoritismo del líder del equipo para incluir activamente a estudiantes en el equipo por razones sociales, culturales y de género.                                                                     | 3.03              | 1.41 | 2.68             | 1.44 | 3.18              | 1.50 | 2.75            | 1.55 | 3.33               | 1.22 | 4.05                    |   |                            |  |
| 3                                                                                            | Cuando tengo la oportunidad de participar en un procedimiento quirúrgico la institución me provee los recursos materiales adecuados (ej. vestido quirúrgico, elementos de protección, chaleco anti-radiación) | 3.79              | 1.43 | 3.68             | 1.41 | 4.50              | 0.74 | 4.35            | 0.99 | 3.11               | 1.67 | 12.3                    | * |                            |  |
| 4                                                                                            | Mi participación en una cirugía se limita por la necesidad de terminar rápidamente el procedimiento y por cuestiones de eficiencia administrativa                                                             | 3.11              | 1.43 | 2.64             | 1.35 | 3.50              | 1.60 | 2.90            | 1.52 | 3.31               | 1.26 | 5.33                    |   |                            |  |
| 5                                                                                            | Las relaciones interpersonales entre los cirujanos a cargo del cuidado de los pacientes son adecuadas                                                                                                         | 3.77              | 1.22 | 3.76             | 1.30 | 4.09              | 0.87 | 3.30            | 1.34 | 3.83               | 1.25 | 3.55                    |   |                            |  |
| 6                                                                                            | Las discusiones entre cirujanos relacionadas con el cuidado del paciente son respetuosas y constructivas para los demás miembros del equipo.                                                                  | 4.02              | 1.10 | 4.48             | 0.77 | 4.45              | 0.74 | 3.30            | 1.34 | 3.83               | 1.11 | 14.03                   | * | Incluido                   |  |
| 7                                                                                            | El uso de teléfonos celulares y otros dispositivos de comunicación es apropiado en el quirófano y no interfiere con la concentración del equipo de trabajo                                                    | 3.47              | 1.25 | 3.36             | 1.47 | 3.82              | 0.96 | 3.00            | 1.34 | 3.58               | 1.16 | 4.11                    |   |                            |  |
| 8                                                                                            | Los cirujanos, residentes de cirugía y el personal del quirófano (anestesiólogo, instrumentadora, enfermería) trabajan en equipo                                                                              | 4.14              | 1.02 | 4.24             | 1.05 | 4.10              | 0.77 | 4.15            | 1.09 | 4.08               | 1.13 | 1.06                    |   | Incluido                   |  |
| 9                                                                                            | Las órdenes del líder del equipo son claras en su contenido y son comunicadas de forma adecuada.                                                                                                              | 4.19              | 0.86 | 4.36             | 0.91 | 4.55              | 0.51 | 3.85            | 0.88 | 4.06               | 0.92 | 7.94                    | * | Incluido                   |  |
| 10                                                                                           | Entiendo mi rol de estudiante en el equipo de trabajo y soy receptivo las ordenes que recibo                                                                                                                  | 4.33              | 0.80 | 4.24             | 0.88 | 4.50              | 0.60 | 4.20            | 1.06 | 4.36               | 0.68 | 0.76                    |   | Incluido                   |  |
| 11                                                                                           | Reviso la información relevante del paciente (historia clínica, examen físico y estudios diagnósticos), así como los protocolos de manejo antes de participar en un procedimiento específico                  | 4.51              | 0.68 | 4.56             | 0.82 | 4.68              | 0.57 | 4.40            | 0.68 | 4.44               | 0.65 | 2.75                    |   | Incluido                   |  |
| 12                                                                                           | Me siento inferior que los demás miembros del equipo de trabajo (cirujanos, instrumentadoras, residentes)                                                                                                     | 3.15              | 1.49 | 2.64             | 1.58 | 3.32              | 1.52 | 2.75            | 1.29 | 3.61               | 1.40 | 7.78                    | * |                            |  |
| 13                                                                                           | El líder del equipo de trabajo es respetuoso y me transmite confianza y seguridad                                                                                                                             | 4.25              | 0.79 | 4.52             | 0.65 | 4.45              | 0.60 | 4.05            | 0.85 | 4.03               | 0.88 | 6.57                    |   | Incluido                   |  |
| 14                                                                                           | Otros miembros del equipo (instrumentadoras, anestesiólogos, residentes), diferentes al líder, son respetuosos conmigo y me consideran parte activa del equipo de trabajo                                     | 3.85              | 1.15 | 4.12             | 1.01 | 4.32              | 0.72 | 4.15            | 0.75 | 3.22               | 1.38 | 12.11                   | * |                            |  |
| 15                                                                                           | El líder del equipo me explica cuál es mi rol y responsabilidad en el equipo de trabajo                                                                                                                       | 4.13              | 1.01 | 4.44             | 0.92 | 4.27              | 0.83 | 4.10            | 0.79 | 3.83               | 1.21 | 5.21                    |   | Incluido                   |  |

|    |                                                                                                                                           |      |      |      |      |      |      |      |      |      |      |       |   |          |
|----|-------------------------------------------------------------------------------------------------------------------------------------------|------|------|------|------|------|------|------|------|------|------|-------|---|----------|
| 16 | La carga de trabajo es adecuadamente distribuida entre los miembros del equipo                                                            | 4.22 | 0.91 | 4.25 | 1.15 | 4.27 | 0.94 | 4.20 | 0.62 | 4.17 | 0.88 | 1.4   |   | Incluido |
| 17 | Los miembros del equipo tienen una actitud positiva hacia el trabajo en equipo y están dispuestos a enseñarme                             | 4.33 | 0.92 | 4.44 | 1.04 | 4.57 | 0.60 | 4.15 | 1.04 | 4.22 | 0.90 | 3.18  |   | Incluido |
| 18 | El Departamento en donde realizo mi rotación cuenta con protocolos, guías de manejo y procesos asistenciales ordenados                    | 4.00 | 1.15 | 4.13 | 1.08 | 3.91 | 1.15 | 3.65 | 1.18 | 4.08 | 1.18 | 2.9   |   | Incluido |
| 19 | Los miembros del equipo de trabajo reconocen cuál es su función                                                                           | 4.16 | 0.88 | 4.32 | 1.03 | 4.23 | 0.81 | 3.95 | 0.76 | 4.11 | 0.89 | 3.42  |   | Incluido |
| 20 | La seguridad del paciente es una prioridad para el equipo de trabajo                                                                      | 4.47 | 0.80 | 4.44 | 0.92 | 4.45 | 0.74 | 4.35 | 0.75 | 4.56 | 0.81 | 1.47  |   | Incluido |
| 21 | La comunicación entre los miembros del equipo de trabajo es adecuada                                                                      | 4.13 | 1.02 | 4.48 | 0.92 | 3.91 | 1.15 | 3.79 | 1.23 | 4.19 | 0.82 | 6.4   |   | Incluido |
| 22 | Los objetivos del equipo de trabajo son fácilmente identificables y están al alcance de todos sus miembros                                | 4.09 | 0.91 | 4.12 | 1.01 | 4.23 | 0.92 | 3.85 | 0.75 | 4.11 | 0.92 | 2.94  |   | Incluido |
| 23 | Los miembros del equipo conocen el plan de manejo del paciente y discuten sus posibles cambios                                            | 4.30 | 0.80 | 4.52 | 0.77 | 4.50 | 0.60 | 4.05 | 0.89 | 4.17 | 0.85 | 5.26  |   | Incluido |
| 24 | El Departamento en donde realizo mi rotación proporciona una adecuada inducción a los estudiantes al inicio de la rotación                | 3.82 | 1.17 | 4.28 | 0.94 | 3.77 | 1.07 | 3.70 | 1.22 | 3.58 | 1.30 | 5.02  |   |          |
| 25 | Demuestro motivación y disposición de aprender durante la rotación                                                                        | 4.34 | 0.93 | 4.12 | 1.01 | 4.59 | 0.91 | 4.25 | 1.21 | 4.39 | 0.69 | 3.46  |   | Incluido |
| 26 | Tengo el control de mi propio trabajo y soy proactivo                                                                                     | 4.31 | 0.91 | 3.84 | 1.18 | 4.55 | 0.80 | 4.50 | 0.76 | 4.39 | 0.73 | 5.74  |   | Incluido |
| 27 | Aprendo de los errores que se cometen en el equipo de trabajo                                                                             | 4.40 | 0.80 | 4.04 | 1.06 | 4.55 | 0.74 | 4.50 | 0.61 | 4.51 | 0.66 | 3.9   |   | Incluido |
| 28 | Confío en el trabajo de los demás                                                                                                         | 3.66 | 1.05 | 3.96 | 1.02 | 3.73 | 0.98 | 3.25 | 1.12 | 3.64 | 1.05 | 4.86  |   |          |
| 29 | Cuando no entiendo una orden solicito aclaraciones para ejecutarla adecuadamente                                                          | 4.21 | 0.82 | 4.20 | 0.82 | 4.14 | 0.89 | 4.25 | 0.79 | 4.25 | 0.84 | 0.28  |   | Incluido |
| 30 | Cuando se me confía una actividad específica la delego en otros miembros del equipo                                                       | 2.80 | 1.48 | 3.52 | 1.36 | 2.32 | 1.29 | 2.25 | 1.52 | 2.89 | 1.49 | 10.62 | * |          |
| 31 | Cuando encuentro una situación anormal en el cuidado o evolución del paciente tomo la iniciativa para alertar al equipo de trabajo        | 4.41 | 0.71 | 4.44 | 0.71 | 4.45 | 0.80 | 4.50 | 0.61 | 4.31 | 0.71 | 1.24  |   | Incluido |
| 32 | Me adapto fácilmente al equipo de trabajo que se me asigna                                                                                | 4.07 | 0.97 | 4.08 | 1.00 | 4.32 | 0.99 | 3.95 | 1.00 | 3.97 | 0.94 | 2.76  |   | Incluido |
| 33 | Demuestro interés en ayudar a mis compañeros cuando tienen dificultades de adaptación o desempeño en el equipo de trabajo.                | 4.29 | 0.78 | 4.12 | 1.01 | 4.19 | 0.75 | 4.50 | 0.61 | 4.36 | 0.68 | 1.98  |   | Incluido |
| 34 | Cuando se me encomiendan responsabilidades que no están para mi nivel solicito que estas sean asignadas a otros miembros del equipo.      | 3.72 | 1.27 | 4.20 | 1.04 | 3.48 | 1.21 | 3.65 | 1.35 | 3.56 | 1.36 | 5.14  |   |          |
| 35 | Con frecuencia se sub-estima o sobreestima mi experiencia como participante en el equipo de trabajo                                       | 3.46 | 1.30 | 3.16 | 1.60 | 3.52 | 1.25 | 3.30 | 1.30 | 3.72 | 1.09 | 1.56  |   |          |
| 36 | Con frecuencia el líder del equipo asume "a priori" que cuento con habilidades previas y conocimientos para desempeñarme efectivamente    | 3.87 | 1.14 | 3.20 | 1.41 | 3.95 | 1.20 | 4.20 | 0.77 | 4.11 | 0.89 | 7.58  | * |          |
| 37 | Frecuentemente existen contradicciones entre los miembros del equipo                                                                      | 3.91 | 1.10 | 3.52 | 1.29 | 3.75 | 1.02 | 4.30 | 0.92 | 4.06 | 1.01 | 5.77  |   |          |
| 38 | Cuando cometo un error los miembros del equipo de trabajo analizan adecuadamente la situación y se propone una estrategia de mejoramiento | 3.81 | 1.10 | 4.08 | 1.00 | 4.30 | 0.80 | 3.30 | 1.08 | 3.64 | 1.20 | 10.52 | * |          |
| 39 | Cuando un miembro del equipo comete un error, este se castiga punitivamente en el equipo de trabajo                                       | 2.84 | 1.45 | 2.56 | 1.45 | 3.15 | 1.66 | 2.65 | 1.42 | 2.97 | 1.34 | 2.32  |   |          |

|                                   |                                                                                                                                                                                         |      |      |      |      |      |      |      |      |      |      |      |   |          |
|-----------------------------------|-----------------------------------------------------------------------------------------------------------------------------------------------------------------------------------------|------|------|------|------|------|------|------|------|------|------|------|---|----------|
| 40                                | Se privilegia mi rol asistencial con respecto al educativo en el equipo de trabajo                                                                                                      | 3.85 | 1.19 | 3.48 | 1.23 | 4.20 | 1.06 | 3.80 | 1.28 | 3.94 | 1.17 | 4.45 |   |          |
| 41                                | Con frecuencia el líder del equipo ignora mi presencia                                                                                                                                  | 3.12 | 1.43 | 2.88 | 1.48 | 3.30 | 1.63 | 2.90 | 1.37 | 3.31 | 1.33 | 2.04 |   |          |
| 42                                | En la institución donde realizo mi rotación existe restricción en el acceso a zonas hospitalarias específicas lo cual limita mis oportunidades de participación en el equipo de trabajo | 2.94 | 1.52 | 3.48 | 1.19 | 2.90 | 1.52 | 2.55 | 1.57 | 2.81 | 1.65 | 4.75 |   |          |
| 43                                | Me preocupo por mejorar mis conocimientos y habilidades para participar activamente en el equipo de trabajo                                                                             | 4.27 | 0.79 | 4.28 | 0.68 | 4.25 | 0.85 | 4.25 | 0.97 | 4.28 | 0.74 | 0.11 |   | Incluido |
| 44                                | Con frecuencia siento miedo de involucrarme en el equipo de trabajo                                                                                                                     | 3.02 | 1.44 | 3.36 | 1.55 | 2.80 | 1.44 | 2.55 | 1.43 | 3.17 | 1.34 | 4.19 |   |          |
| 45                                | Soy puntual y cumplo con las actividades que se me asignan                                                                                                                              | 4.50 | 0.84 | 4.28 | 1.10 | 4.55 | 0.83 | 4.60 | 0.68 | 4.56 | 0.73 | 0.75 |   | Incluido |
| 46                                | Me siento seguro y tengo confianza para participar en el equipo de trabajo                                                                                                              | 4.14 | 1.00 | 3.92 | 1.32 | 4.30 | 0.73 | 4.10 | 0.97 | 4.22 | 0.90 | 0.53 |   | Incluido |
| 47                                | Establezco buenas relaciones con otros miembros del equipo de trabajo (cirujanos a cargo, residentes, estudiantes, personal médico y paramédico)                                        | 4.43 | 0.82 | 4.20 | 0.96 | 4.50 | 0.89 | 4.70 | 0.57 | 4.39 | 0.77 | 3.87 |   | Incluido |
| 48                                | Recibo retroalimentación sobre mi desempeño en el equipo de trabajo                                                                                                                     | 4.00 | 1.14 | 4.28 | 0.98 | 4.20 | 0.83 | 3.40 | 1.43 | 3.75 | 1.13 | 6.64 |   | Incluido |
| 49                                | Soy receptivo y escucho con atención la retroalimentación sobre mi desempeño en el equipo de trabajo                                                                                    | 4.36 | 0.82 | 4.08 | 1.08 | 4.45 | 0.76 | 4.26 | 0.81 | 4.56 | 0.61 | 3.16 |   | Incluido |
| 50                                | Siento que debo mantener una distancia importante con otros miembros dada la jerarquía del equipo                                                                                       | 3.27 | 1.29 | 3.08 | 1.47 | 2.75 | 1.37 | 3.40 | 0.99 | 3.61 | 1.18 | 5.46 |   |          |
| 51                                | Cuando tengo un conflicto en el equipo busco solucionarlo adecuadamente                                                                                                                 | 4.15 | 0.91 | 4.04 | 0.95 | 4.15 | 0.88 | 3.95 | 1.10 | 4.33 | 0.79 | 2.05 |   | Incluido |
| 52                                | Doy retroalimentación sobre su desempeño a otros miembros del equipo de trabajo (cirujanos a cargo, residentes, estudiantes, personal médico y paramédico)                              | 3.55 | 1.31 | 4.12 | 1.09 | 3.95 | 0.97 | 3.00 | 1.34 | 3.22 | 1.42 | 11.4 | * |          |
| 53                                | Reconozco los logros de los demás en el equipo de trabajo                                                                                                                               | 4.26 | 0.90 | 3.96 | 1.16 | 4.19 | 1.03 | 4.35 | 0.67 | 4.44 | 0.69 | 2.09 |   | Incluido |
| 54                                | Cuando requiero asistencia los miembros del equipo están dispuestos a ayudarme                                                                                                          | 4.18 | 0.79 | 4.28 | 0.68 | 4.29 | 0.72 | 4.00 | 0.73 | 4.14 | 0.93 | 1.74 |   | Incluido |
| 55                                | El líder del equipo de trabajo es un modelo para mí.                                                                                                                                    | 4.00 | 1.06 | 4.00 | 1.04 | 4.29 | 0.90 | 3.85 | 1.23 | 3.89 | 1.06 | 1.91 |   | Incluido |
| * p<0.05. DE: Desviación estándar |                                                                                                                                                                                         |      |      |      |      |      |      |      |      |      |      |      |   |          |
